# Supplementary material
Source: PubMed Central journal article supplement (PMC1459031)
Supplement: pnas_0602048103_2.pdf [file pnas_0602048103_2.pdf]

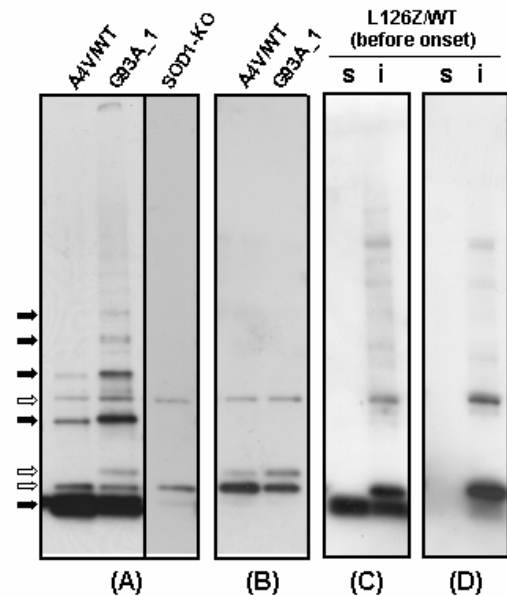

- (A) 1° antibody (sheep anti-hSOD1)  
+ 2° antibody (rat anti-sheep IgG)
- (B) 2° antibody (rat anti-sheep IgG) only
- (C) 1° antibody (rabbit anti-C-term hSOD1)  
+ 2° antibody (goat anti-rabbit IgG)
- (D) 2° antibody (goat anti-rabbit IgG) only
