# Supplementary material
Source: PubMed Central journal article supplement (PMC1459031)

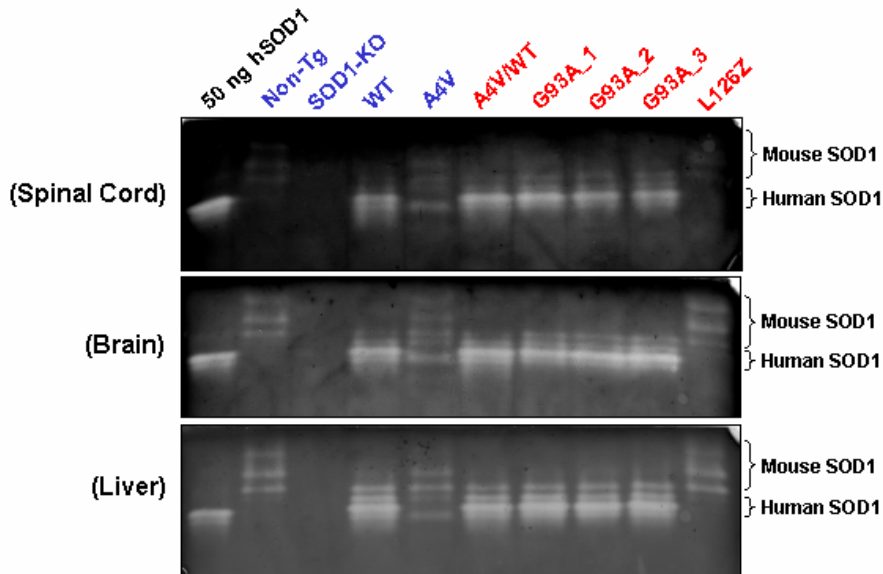

Supplement: pnas_0602048103_1.pdf [file pnas_0602048103_1.pdf]
